# Supplementary material
Source: publisher figshare collection journal article supplement (https://gsapubs.figshare.com/ndownloader/files/22739444)
Supplement: Supplementary file 1 [file 22739444]

GSA Data Repository Item # 7518

Title of article North Carolina shelf-edge sandstone; age, environment of  
origin, and relationship to pre-existing sea levels

Author(s) I. G. Macintyre et al.

see GSA Bulletin v. 86, p. 1073 - 1078

Contents 1 page

Table 1 - Petrographic Descripton of Shelf-Break

Sandstones

---

---

---

---

---

---

---

---

---

---

TABLE 1. PETROGRAPHIC DESCRIPTION OF SHELF-BREAK SANDSTONES

Macintyre, J.C., and others

# 75-18

| Sample number | Location (Down & up position of dredge hauls)    | Depth in meters | Rock type                                | Dominant carbonate components                                                                                                                                                  | Dominant non-carbonate components                                                               | Cement                                                                                  | Matrix                                                                                                                                                                                                                                               |
|---------------|--------------------------------------------------|-----------------|------------------------------------------|--------------------------------------------------------------------------------------------------------------------------------------------------------------------------------|-------------------------------------------------------------------------------------------------|-----------------------------------------------------------------------------------------|------------------------------------------------------------------------------------------------------------------------------------------------------------------------------------------------------------------------------------------------------|
| 2737          | 34°01.4'N<br>76°18.0'W<br>34°01.4'N<br>76°17.8'W | 88-89           | Light brown quartz-rich calcarenite      | Medium to gravel-size skeletal grains (foral-line algae, molluscs, barnacles, echinoderms, planktonic Foraminifera) and oolithe                                                | 24% medium to very coarse quartz. Moderate to high sphericity (0.7 to 0.9) and subrounded (0.5) | Thin (10-20 $\mu$ ) dentate rim cement                                                  | Submicrocrystalline and fossiliferous submicrocrystalline calcilutite patches. Commonly showing pelletoid or relict pelletoid texture                                                                                                                |
| 7845          | 34°06.5'N<br>76°15.5'W<br>34°06.5'N<br>76°15.5'W | 73-74           | Light brown quartz-rich calcarenite      | Fine to gravel-size skeletal grains (molluscs, coralline algae, benthonic Foraminifera, echinoderms, serpulids, and bryozoan) oolithe and oolite lithoclasts                   | 13% fine to very coarse quartz. Moderate sphericity (0.7) and subangular (0.3)                  | Grains have a thin (<10 $\mu$ ) dentate rim cement                                      | Small patches of submicrocrystalline calcilutite which has pelletoid (20 $\mu$ ) or relict pelletoid texture                                                                                                                                         |
| 7848          | 34°09.1'N<br>76°11.0'W<br>34°09.1'N<br>76°11.0'W | 68-95           | Light brown quartz-rich calcarenite      | Very fine to gravel-size skeletal grains (coralline algae, molluscs, echinoderms, barnacles, benthonic Foraminifera, and serpulids) and a few oolithe                          | 15% very fine to very coarse quartz. Moderate sphericity (0.7) and rounded (0.7)                | Most grains have a thick dense acicular rim cement (up to 100 $\mu$ thick)              |                                                                                                                                                                                                                                                      |
| 8085          | 34°03.6'N<br>76°15.8'W<br>34°03.5'N<br>76°15.9'W | 92-102          | Light gray brown quartz-rich calcarenite | Medium to gravel-size skeletal grains (molluscs, coralline algae, bryozoans, barnacles, benthonic Foraminifera and planktonic Foraminifera) and oolithe and oolite lithoclasts | 33% medium to coarse quartz. Moderate sphericity (0.7) and subrounded (0.5)                     | Most grains have well developed dentate rim cement (up to 30 $\mu$ thick)               | Small patches of pelletoid (up to 50 $\mu$ ) submicrocrystalline calcilutite.                                                                                                                                                                        |
| 8200          | 33°58.4'N<br>76°22.4'W<br>33°58.4'N<br>76°22.4'W | 99-108          | Light brown quartz-rich calcarenite      | Medium to gravel-size skeletal grains (molluscs, coralline algae, barnacles, bryozoan, benthonic and planktonic Foraminifera, echinoderms, and serpulids) and oolithe          | 16% very fine to very coarse quartz. Moderate sphericity (0.7) and subangular (0.3)             | Thin (10 $\mu$ ) dentate rim cement                                                     | Scattered patches of pelletoid (up to 50 $\mu$ ) submicrocrystalline calcilutite                                                                                                                                                                     |
| 8234          | 34°15.8'N<br>76°02.4'W<br>34°15.8'N<br>76°02.5'W | 82-100          | Light brown quartz-rich calcarenite      | Coarse to gravel-size skeletal grains (molluscs, barnacles, coralline algae, serpulids, bryozoans, and echinoderms).                                                           | 32% medium to coarse quartz. High sphericity (0.9) and rounded                                  | Both carbonate and quartz grains have a thick dentate rim cement (up to 50 $\mu$ thick) | Dense submicrocrystalline calcilutite matrix infills most of the intergranular voids. Generally has a pelletoid (up to 150 $\mu$ ) or relict pelletoid texture. Patches of very fine to extremely fine fossiliferous submicrocrystalline calcilutite |
